# Supplementary material
Source: ML conference proceedings conference paper supplement (https://proceedings.mlr.press/v89/muller19a.html)
Supplement: Supplementary file [file muller19a-supp.pdf]

## A Appendix: Supplementary Material

### A.1 Proof of Lemma 2

*Proof:* Let  $k$  be fixed and  $n_k = n$ . Let  $(X_t)_{t=1}^n$  denote the sequence of rewards associated with arm  $k$ , where we recall that  $X_t \sim \mathcal{N}(\boldsymbol{\mu}, \sigma_k^2 \mathbf{I}_2/2)$ . Then  $\bar{\mathbf{x}}_{k,n} = \frac{1}{n} \sum_{t=1}^n X_t \sim \mathcal{N}(\boldsymbol{\mu}, \sigma_k^2 \mathbf{I}_2/(2n))$ , implying that  $\text{cov}\{(X_t - \bar{\mathbf{x}}_{k,n}), \bar{\mathbf{x}}_{k,n}\} = \frac{1}{n^2}(n\sigma^2 \mathbf{I} - n\sigma^2 \mathbf{I}) = 0$ . It follows that, conditioned on  $\sigma_k^2$  and  $\boldsymbol{\mu}_k$ ,  $\bar{\mathbf{x}}_{k,n}$  and  $(X_t - \bar{\mathbf{x}}_{k,n})$  are statistically independent for every  $t \in \{1, \dots, n\}$ , so  $\bar{\mathbf{x}}_{k,n}$  and  $S_{k,n}$  are also independent.

On the other hand, because  $\text{Re } X_t$  and  $\text{Im } X_t$  have equal variances,  $S_{k,n}$  satisfies

$$\begin{aligned} S_{k,n} &= \sum_{t=1}^n \left\| X_t - \frac{1}{n} \sum_{i=1}^n X_i \right\|^2 \\ &= \sum_{t=1}^n X_t^\top X_t - \frac{1}{n} \sum_{i,j=1}^n X_i^\top X_j, \end{aligned} \quad (18)$$

hence, defining

$$\mathbf{A} := \begin{bmatrix} \left(\frac{\lambda}{n} + \frac{1}{\sigma_k^2} - \lambda\right) \mathbf{I}_2 & -\frac{\lambda}{n} \mathbf{I}_2 & \cdots & \frac{\lambda}{n} \mathbf{I}_2 \\ \frac{\lambda}{n} \mathbf{I}_2 & \left(\frac{\lambda}{n} + \frac{1}{\sigma_k^2} - \lambda\right) \mathbf{I}_2 & \cdots & \frac{\lambda}{n} \mathbf{I}_2 \\ \vdots & \vdots & \ddots & \vdots \\ \frac{\lambda}{n} \mathbf{I}_2 & \frac{\lambda}{n} \mathbf{I}_2 & \cdots & \left(\frac{\lambda}{n} + \frac{1}{\sigma_k^2} - \lambda\right) \mathbf{I}_2 \end{bmatrix} \in \mathbb{R}^{2n \times 2n}, \quad (19)$$

it follows that

$$\begin{aligned} \mathbb{E}\{e^{\lambda S_{k,n}}\} &= \frac{1}{(\pi \sigma_k^2)^n} \int_{\mathbb{R}^{2n}} e^{\lambda(\sum_{t=1}^n X_t^\top X_t - \frac{1}{n} \sum_{t=1}^n X_t^\top X_i) - \frac{\lambda}{\sigma_k^2} \sum_{t=1}^n X_t^\top X_t} dX_1 \cdots dX_n \\ &= \frac{1}{(\pi \sigma_k^2)^n} \int_{\mathbb{R}^{2n}} e^{[X_1^\top \cdots X_n^\top] \mathbf{A} \begin{bmatrix} X_1 \\ \vdots \\ X_n \end{bmatrix}} dX_1 \cdots dX_n \\ &= \frac{\sqrt{\det \mathbf{A}^{-1}}}{\sigma_k^{2n}} \\ &= \frac{\det^{-1/2} \left\{ \left[ \frac{1}{\sigma_k^2} - \lambda \right] \mathbf{I}_{2n} + \frac{\lambda}{n} \mathbf{1}_n \mathbf{1}_n^\top \otimes \mathbf{I}_2 \right\}}{\sigma_k^{2n}} \\ &= \frac{1}{\sigma_k^{2n}} \left( \frac{1}{\sigma_k^2} - \lambda \right)^{-(2n)/2} \left( \left( 1 + \frac{\lambda n}{n \left( \frac{1}{\sigma_k^2} - \lambda \right)} \right)^2 \right)^{-1/2} \\ &= \frac{1}{(1 - \sigma_k^2 \lambda)^{n-1}}, \quad \lambda < 1/\sigma_k^2, \end{aligned} \quad (20)$$

where  $\otimes$  denotes Kronecker's product. Thus,  $S_{k,n}/(\sigma_k^2/2) \sim \chi_{2(n-1)}^2$  because of uniqueness of the moment-generating function, so its pdf is given by

$$f_{S_{k,n}|\boldsymbol{\mu}, \sigma_k^2}(s) = \frac{s^{n-2}}{\Gamma(n-1)} \frac{e^{-s/\sigma_k^2}}{\sigma_k^{2(n-1)}}, \quad (21)$$

and the likelihood of  $(\bar{\mathbf{x}}_{k,n}, S_{k,n})$  is given by

$$\begin{aligned} f_{S_{k,n}, \bar{\mathbf{x}}_{k,n}|\boldsymbol{\mu}_k, \sigma_k^2}(s, \mathbf{x}) &= f_{S_{k,n}|\boldsymbol{\mu}_k, \sigma_k^2}(s) f_{\bar{\mathbf{x}}_{k,n}|\boldsymbol{\mu}_k, \sigma_k^2}(\mathbf{x}) \\ &= \frac{n}{\pi \sigma_k^2} e^{-\frac{n}{\sigma_k^2} \|\mathbf{x} - \boldsymbol{\mu}\|^2} \frac{s^{n-2}}{\Gamma(n-1)} \frac{e^{-s/\sigma_k^2}}{\sigma_k^{2(n-1)}} \\ &= \frac{n s^{n-2}}{\pi \Gamma(n-1)} \frac{e^{-\frac{1}{\sigma_k^2}(s+n\|\mathbf{x} - \boldsymbol{\mu}\|^2)}}{\sigma_k^{2n}}. \end{aligned} \quad (22)$$

It now follows that, for a uniform (improper) prior over  $(\boldsymbol{\mu}_k, \sigma_k^2)$ , for every arm  $k \in \{1, \dots, K\}$ ,

$$\begin{aligned}
 f_{\boldsymbol{\mu}_k, \sigma_k^2 | \bar{\mathbf{x}}_{k,n} = \mathbf{x}, S_{k,n} = s}(\boldsymbol{\mu}_k, \sigma_k^2) &= \frac{f_{S_{k,n}, \bar{\mathbf{x}}_{k,n} | \boldsymbol{\mu}_k, \sigma_k^2}(s, \mathbf{x}) \cdot 1}{\int_0^\infty \int_{\mathbb{R}^2} f_{S_{k,n}, \bar{\mathbf{x}}_{k,n} | \boldsymbol{\mu}_k, \sigma_k^2}(s, \mathbf{x}) \cdot 1 d\boldsymbol{\mu}_k d(\sigma_k^2)} \\
 &= \frac{\frac{ns^{n-2}}{\pi\Gamma(n-1)\sigma_k^{2n}} e^{-\frac{1}{\sigma_k^2}(s+n\|\mathbf{x}-\boldsymbol{\mu}_k\|^2)}}{\int_0^\infty \left( \frac{ns^{n-2}}{\pi\Gamma(n-1)\sigma_k^{2n}} e^{-s/\sigma_k^2} \int_{\mathbb{R}^2} e^{\frac{-n}{\sigma_k^2}\|\mathbf{x}-\boldsymbol{\mu}_k\|^2} d\boldsymbol{\mu}_k \right) d(\sigma_k^2)} \\
 &= \frac{\frac{ns^{n-2}}{\pi\Gamma(n-1)\sigma_k^n} e^{-\frac{1}{\sigma_k^2}(s+n\|\mathbf{x}-\boldsymbol{\mu}_k\|^2)}}{\int_0^\infty \frac{ns^{n-2}}{\pi\Gamma(n-1)\sigma_k^{2n}} e^{-\frac{s}{\sigma_k^2}} \frac{\sigma_k^2 \pi}{n} d(\sigma_k^2)} \\
 &\stackrel{(a)}{=} \frac{\frac{ns^{n-2}}{\pi\sigma_k^{2n}} e^{-\frac{1}{\sigma_k^2}(s+n\|\mathbf{x}-\boldsymbol{\mu}_k\|^2)}}{\int_0^\infty u^{n-3} e^{-u} du} \\
 &= \frac{ns^{n-2}}{\pi\Gamma(n-2)\sigma_k^{2n}} e^{-\frac{1}{\sigma_k^2}(s+n\|\mathbf{x}-\boldsymbol{\mu}_k\|^2)}, \tag{23}
 \end{aligned}$$

where (a) follows from  $u = s/\sigma_k^2$ . Therefore, the posterior distribution for the mean  $\boldsymbol{\mu}_k$  is

$$\begin{aligned}
 f_{\boldsymbol{\mu}_k | \bar{\mathbf{x}}_{k,n} = \mathbf{x}, S_{k,n} = s}(\boldsymbol{\mu}_k) &= \int f_{\boldsymbol{\mu}, \sigma^2 | \bar{\mathbf{x}}_{k,n} = \mathbf{x}, S_{k,n} = s}(\boldsymbol{\mu}_k, \sigma_k^2) d(\sigma_k^2) \\
 &= \frac{ns^{n-2}}{\pi\Gamma(n-2)} \int_0^\infty \frac{e^{-\frac{1}{\sigma_k^2}(s+n\|\mathbf{x}-\boldsymbol{\mu}_k\|^2)}}{\sigma_k^{2n}} d(\sigma_k^2) \\
 &= \frac{ns^{n-2}}{\pi\Gamma(n-2)} \left( s + n\|\mathbf{x} - \boldsymbol{\mu}_k\|^2 \right)^{-n+1} \int_0^\infty e^{-u} u^{n-2} du \\
 &= \frac{n(n-2)}{\pi s} \left( 1 + \frac{n\|\mathbf{x} - \boldsymbol{\mu}_k\|^2}{s} \right)^{-n+1}, \tag{24}
 \end{aligned}$$

where (b) follows from  $u = (s + n\|\mathbf{x} - \boldsymbol{\mu}_k\|^2)/\sigma_k^2$ . ■

## A.2 Lemma 5

**Lemma 5** *Under the conditions of Theorem 1,*

$$\mathbb{E} \left\{ \sum_{t=\bar{T}+1}^T \mathbb{1} \{k^{\text{TS}}(t) = k, \mathcal{A}(t), \mathcal{B}_k(t)\} \right\} \leq \frac{\log T}{\log \left( 1 + \frac{\langle \|\boldsymbol{\mu}_1\| - \|\boldsymbol{\mu}_k\| - 2\epsilon \rangle^2}{\sigma_k^2 + \epsilon} \right)} + 3. \tag{25}$$

*Proof:* Firstly, the fact that  $\mathbb{1} \{k^{\text{TS}}(t) = k, \mathcal{A}(t), \mathcal{B}_k(t)\} = 1$  implies that  $\|\tilde{\boldsymbol{\mu}}^*(t)\| = \|\tilde{\boldsymbol{\mu}}_k(t)\| \geq \|\boldsymbol{\mu}_1\| - \epsilon$  under  $\mathcal{B}_k(t)$ . Recall also the fact that  $k^{\text{TS}}(t) = k \implies N_k(t+1) \geq N_k(t) + 1$ . Then, for every  $n > 0$  it holds that

$$\begin{aligned}
 \sum_{t=\bar{T}+1}^T \mathbb{1} \{k^{\text{TS}}(t) = k, \mathcal{A}(t), \mathcal{B}_k(t)\} &= \sum_{t=\bar{T}+1}^T \mathbb{1} \{k^{\text{TS}}(t) = k, \|\tilde{\boldsymbol{\mu}}_k(t)\| \geq \|\boldsymbol{\mu}_1\| - \epsilon, \mathcal{B}_k(t)\} \\
 &\leq \mathbb{1} \{k^{\text{TS}}(t) = k, \|\tilde{\boldsymbol{\mu}}_k(t)\| \geq \|\boldsymbol{\mu}_1\| - \epsilon, \mathcal{B}_k(t), N_k(t) \geq n\} \\
 &\quad + \sum_{t=\bar{T}+1}^T \mathbb{1} \{k^{\text{TS}}(t) = k, N_k(t) \leq n\} \\
 &\leq n + \sum_{t=\bar{T}+1}^T \mathbb{1} \{\|\tilde{\boldsymbol{\mu}}_k(t)\| \geq \|\boldsymbol{\mu}_1\| - \epsilon, \mathcal{B}_k(t), N_k(t) \geq n\}. \tag{26}
 \end{aligned}$$

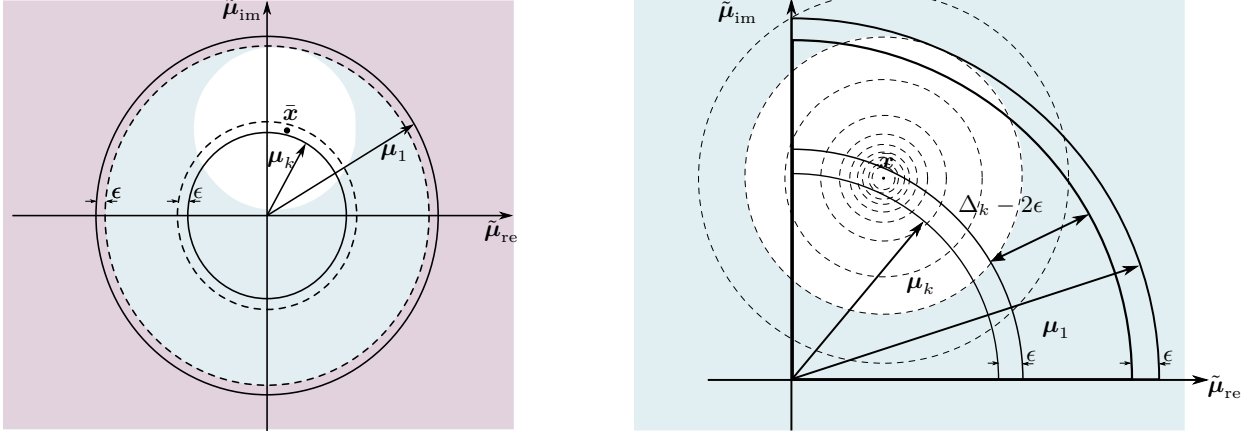

Figure 6: Upper-bounding the probability of  $\|\tilde{\mu}_k(t)\| \leq \|\tilde{\mu}_1(t)\| - \epsilon$ , given  $\hat{\theta}_{k,n}$ . On the left side, the red area is upper bounded by the points outside the white circle centered at  $\bar{x}$ . The right figure shows that the symmetric distribution around  $\bar{x}$  and an upper bound for the area outside the circle of radius  $\|\mu_1\| - \epsilon$  is upper bounded by any circle of radius  $\Delta_k - 2\epsilon$  centered at  $\bar{x}$ , whenever  $\|\bar{x}_k\| \leq \|\mu_k\| - \epsilon$ .

Secondly, we can upper bound  $\mathbb{P}\{\|\tilde{\mu}_k(t)\| \geq \|\mu_1\| - \epsilon \mid \mathcal{B}_k(t), N_k(t) = n\}$  as depicted in Fig. 6. From Lemma 4, it follows that

$$\begin{aligned} \mathbb{P}\{\|\tilde{\mu}_k(t)\| \geq \|\mu_1\| - \epsilon \mid \mathcal{B}_k(t), N_k(t) = n\} &\leq \mathbb{P}\{\|\tilde{\mu}_k(t) - \bar{x}_{k,n}\| \geq \|\mu_1\| - \|\mu_k\| - 2\epsilon \mid \mathcal{B}_k(t), N_k(t) = n\} \\ &\leq \left(1 + \frac{(\|\mu_1\| - \|\mu_k\| - 2\epsilon)^2}{\sigma_k^2 + \epsilon}\right)^{-n+2}. \end{aligned} \quad (27)$$

Now notice that (27) is decreasing in  $n$ , which means that  $\mathbb{P}\{\|\tilde{\mu}_k(t)\| \geq \|\mu_1\| - \epsilon \mid \mathcal{B}_k(t), N_k(t) \geq n\} \leq \mathbb{P}\{\|\tilde{\mu}_k(t)\| \geq \|\mu_1\| - \epsilon \mid \mathcal{B}_k(t), N_k(t) = n\}$ , for every  $n > 0$ . Then, the expected value of (26) yields

$$\begin{aligned} \mathbb{E}\left\{\sum_{t=\bar{T}+1}^T \mathbb{1}\{k^{\text{TS}}(t) = k, \mathcal{A}(t), \mathcal{B}_k(t)\}\right\} &\leq n + \sum_{t=\bar{T}+1}^T \mathbb{P}\{k^{\text{TS}}(t) = k, \mathcal{A}(t), \mathcal{B}_k(t), N_k(t) \geq n\} \\ &\leq n + \sum_{t=\bar{T}+1}^T \mathbb{P}\{k^{\text{TS}}(t) = k, \mathcal{A}(t), \mathcal{B}_k(t), N_k(t) = n\} \\ &\leq n + T \left(1 + \frac{(\|\mu_1\| - \|\mu_k\| - 2\epsilon)^2}{\sigma_k^2 + \epsilon}\right)^{-n+2}. \end{aligned}$$

In particular, for  $n = 2 + \frac{\log T}{\log(1 + (\|\mu_1\| - \|\mu_k\| - 2\epsilon)^2 / (\sigma_k^2 + \epsilon))} > 0$  we have that

$$\mathbb{E}\left\{\sum_{t=\bar{T}+1}^T \mathbb{1}\{k^{\text{TS}}(t) = k, \mathcal{A}(t), \mathcal{B}_k(t)\}\right\} \leq \frac{\log T}{\log\left(1 + \frac{(\|\mu_1\| - \|\mu_k\| - 2\epsilon)^2}{\sigma_k^2 + \epsilon}\right)} + 3, \quad (28)$$

which concludes the proof. ■

### A.3 Lemma 6

**Lemma 6** *Under the conditions of Theorem 1, and for every  $k \in \{2, \dots, K\}$ :*

$$\mathbb{E}\left\{\sum_{t=\bar{T}+1}^T \mathbb{1}\{k^{\text{TS}}(t) = k, \mathcal{B}_k(t)^c\}\right\} \leq O(\epsilon^{-2}). \quad (29)$$

*Proof:* We start by noting that the event  $B_k^c(t)$  is independent of  $t$  whenever  $N_k(t)$  is known. Then,

$$\begin{aligned} \sum_{t=\bar{T}+1}^T \mathbb{1} \{k^{\text{TS}}(t) = k, \mathcal{B}_k^c(t)\} &= \sum_{n=\bar{T}/K}^T \mathbb{1} \left\{ \bigcup_{t=\bar{T}+1}^T \{k^{\text{TS}}(t) = k, \mathcal{B}_k^c(t), N_k(t) = n\} \right\} \\ &\leq \sum_{n=\bar{T}/K}^T \mathbb{1} \{ \|\bar{\mathbf{x}}_{n,k}\| \geq \|\boldsymbol{\mu}_k\| + \epsilon \text{ or } S_{n,k} \geq n(\sigma_k^2 + \epsilon) \}. \end{aligned} \quad (30)$$

Then, by means of Lemma 3, the expected value of (30) yields

$$\begin{aligned} \mathbb{E} \left\{ \sum_{t=\bar{T}+1}^T \mathbb{1} \{k^{\text{TS}}(t) = k, \mathcal{B}_k^c(t)\} \right\} &\leq \sum_{n=\bar{T}/K}^T \text{P} \{ \|\bar{\mathbf{x}}_{n,k}\| \geq \|\boldsymbol{\mu}_k\| + \epsilon \} + \text{P} \{ S_{n,k} \geq n(\sigma_k^2 + \epsilon) \} \\ &\leq \sum_{n=\bar{T}/K}^T \left( e^{-n\epsilon^2/\sigma^2} + \left(1 + \frac{\epsilon}{\sigma_k^2}\right)^{-1} e^{-nh(\epsilon/\sigma_k^2)} \right) \\ &\leq \frac{1}{1 - e^{-\epsilon^2/\sigma^2}} + \left(1 + \frac{\epsilon}{\sigma_k^2}\right)^{-1} \frac{1}{1 + e^{-h(\epsilon/\sigma^2)}}. \\ &= O(\epsilon^{-2}) + O(\epsilon^{-2}). \end{aligned} \quad (31)$$

■

#### A.4 Lemma 7

**Lemma 7** *Under the conditions of Theorem 1,*

$$\mathbb{E} \left\{ \Delta_{\max} \sum_{t=\bar{T}+1}^T \mathbb{E} \{ \mathbb{1} \{k^{\text{TS}}(t) \neq 1, \mathcal{A}^c(t)\} \} \right\} \leq O(\epsilon^{-6}). \quad (32)$$

*Proof:* Note that

$$\begin{aligned} \sum_{t=\bar{T}+1}^T \mathbb{1} \{k^{\text{TS}}(t) \neq 1, \mathcal{A}^c(t)\} &= \sum_{t=\bar{T}+1}^T \sum_{n=\bar{T}+1}^T \mathbb{1} \{k^{\text{TS}}(t) \neq 1, \mathcal{A}^c(t), N_1(t) = n\} \\ &= \sum_{n=\bar{T}+1}^T \sum_{m=1}^T \mathbb{1} \left\{ m \leq \sum_{t=\bar{T}+1}^T \mathbb{1} \{k^{\text{TS}}(t) \neq 1, \mathcal{A}^c(t), N_1(t) = n\} \right\}, \end{aligned} \quad (33)$$

since, for a fixed  $t$ ,  $\mathbb{1} \{k^{\text{TS}}(t) \neq 1, \mathcal{A}^c(t), N_1(t) = n\} = 1$  only for that value of  $n$  being exactly  $N_1(t)$ . Observe that  $k^{\text{TS}}(t) \neq 1$  means that  $\|\tilde{\boldsymbol{\mu}}_1(t)\| \leq \|\tilde{\boldsymbol{\mu}}^*(t)\|$ , and  $\mathcal{A}^c(t)$  means  $\|\tilde{\boldsymbol{\mu}}^*(t)\| \leq \|\boldsymbol{\mu}_1\| - \epsilon$ . Then, (33) implies that, for a fixed  $n$ , the event  $\|\tilde{\boldsymbol{\mu}}_1(t)\| \leq \|\boldsymbol{\mu}_1\| - \epsilon$  has taken place, at least,  $m$  times. Let  $\nu_n := \text{P} \left\{ \|\tilde{\boldsymbol{\mu}}_1(t)\| \geq \|\boldsymbol{\mu}_1\| - \epsilon \mid \hat{\theta}_{1,n} \right\}$ . This implies that

$$\begin{aligned} \mathbb{E} \left\{ \sum_{t=\bar{T}+1}^T \mathbb{1} \{k^{\text{TS}}(t) \neq 1, \mathcal{A}^c(t)\} \right\} &= \sum_{n=\bar{T}+1}^T \sum_{m=1}^T \text{P} \left\{ m \leq \sum_{t=\bar{T}+1}^T \mathbb{1} \{k^{\text{TS}}(t) \neq 1, \mathcal{A}^c(t), N_1(t) = n\} \right\} \\ &\leq \mathbb{E} \left\{ \sum_{n=\bar{T}+1}^T \sum_{m=1}^T \left( 1 - \text{P} \left\{ \|\tilde{\boldsymbol{\mu}}_1(t)\| \geq \|\boldsymbol{\mu}_1\| - \epsilon \mid \hat{\theta}_{1,n} \right\} \right)^m \right\} \\ &\leq \sum_{n=\bar{T}+1}^T \mathbb{E} \left\{ \frac{1 - \text{P} \left\{ \|\tilde{\boldsymbol{\mu}}_1(t)\| \geq \|\boldsymbol{\mu}_1\| - \epsilon \mid \hat{\theta}_{1,n} \right\}}{\text{P} \left\{ \|\tilde{\boldsymbol{\mu}}_1(t)\| \geq \|\boldsymbol{\mu}_1\| - \epsilon \mid \hat{\theta}_{1,n} \right\}} \right\}. \end{aligned} \quad (34)$$

Now, when  $\|\bar{\mathbf{x}}_{1,n}\| \geq \|\boldsymbol{\mu}_1\| - \epsilon$  the symmetry of  $p_{k,n}(\tilde{\boldsymbol{\mu}}_1)$  (defined in (10)) around  $\bar{\mathbf{x}}_{1,n}$  guarantees that  $\mathbb{P}\left\{\|\tilde{\boldsymbol{\mu}}_1\| \geq \|\boldsymbol{\mu}_1\| - \epsilon \mid \hat{\theta}_{1,n}\right\} \geq 1/2$ , and then it follows that

$$1 - \mathbb{P}\left\{\|\tilde{\boldsymbol{\mu}}_1\| \geq \|\boldsymbol{\mu}_1\| - \epsilon \mid \hat{\theta}_{1,n}\right\} \leq \frac{1}{2}$$

$$\frac{1}{\mathbb{P}\left\{\|\tilde{\boldsymbol{\mu}}_1\| \geq \|\boldsymbol{\mu}_1\| - \epsilon \mid \hat{\theta}_{1,n}\right\}} \leq 2. \quad (35)$$

This argument allows us to split (34) as

$$\begin{aligned} & \mathbb{E}\left\{\frac{1 - \mathbb{P}\left\{\|\tilde{\boldsymbol{\mu}}_1(t)\| \geq \|\boldsymbol{\mu}_1\| - \epsilon \mid \hat{\theta}_{1,n}\right\}}{\mathbb{P}\left\{\|\tilde{\boldsymbol{\mu}}_1(t)\| \geq \|\boldsymbol{\mu}_1\| - \epsilon \mid \hat{\theta}_{1,n}\right\}}\right\} \\ &= \mathbb{E}\left\{\mathbb{1}\left\{\|\bar{\mathbf{x}}_{1,n}\| \geq \|\boldsymbol{\mu}_1\| - \epsilon\right\}\right\} + \mathbb{E}\left\{\frac{\mathbb{1}\left\{\|\bar{\mathbf{x}}_{1,n}\| \leq \|\boldsymbol{\mu}_1\| - \epsilon\right\}}{\mathbb{P}\left\{\|\tilde{\boldsymbol{\mu}}_1(t)\| \geq \|\boldsymbol{\mu}_1\| - \epsilon \mid \hat{\theta}_{1,n}\right\}}\right\} \\ &= \mathbb{E}\left\{\mathbb{1}\left\{\|\boldsymbol{\mu}_1\| - \frac{\epsilon}{2} \geq \|\bar{\mathbf{x}}_{1,n}\| \geq \|\boldsymbol{\mu}_1\| - \epsilon\right\}\right\} + \mathbb{E}\left\{\frac{\mathbb{1}\left\{\|\bar{\mathbf{x}}_{1,n}\| \leq \|\boldsymbol{\mu}_1\| - \epsilon\right\}}{\mathbb{P}\left\{\|\tilde{\boldsymbol{\mu}}_1(t)\| \geq \|\boldsymbol{\mu}_1\| - \epsilon \mid \hat{\theta}_{1,n}\right\}}\right\} \\ &+ \mathbb{E}\left\{\mathbb{1}\left\{\|\bar{\mathbf{x}}_{1,n}\| \geq \|\boldsymbol{\mu}_1\| - \frac{\epsilon}{2}, S_{k,n} \geq 2\sigma_1^2 n\right\}\right\} \\ &+ 2\mathbb{E}\left\{\mathbb{1}\left\{\|\bar{\mathbf{x}}_{1,n}\| \geq \|\boldsymbol{\mu}_1\| - \frac{\epsilon}{2}, S_{k,n} \leq 2\sigma_1^2 n\right\}\left(1 - \mathbb{P}\left\{\|\tilde{\boldsymbol{\mu}}_1(t)\| \geq \|\boldsymbol{\mu}_1\| - \epsilon \mid \hat{\theta}_{1,n}\right\}\right)\right\}. \quad (36) \end{aligned}$$

We now proceed to upper bound each term in (36). For the first term, we have that

$$\begin{aligned} \mathbb{E}\left\{\mathbb{1}\left\{\|\boldsymbol{\mu}_1\| - \frac{\epsilon}{2} \geq \|\bar{\mathbf{x}}_{1,n}\| \geq \|\boldsymbol{\mu}_1\| - \epsilon\right\}\right\} &\leq \mathbb{P}\left\{\|\bar{\mathbf{x}}_{1,n}\| \leq \|\boldsymbol{\mu}_1\| - \frac{\epsilon}{2}\right\} \\ &= \int_{\|\mathbf{z}\| \leq \|\boldsymbol{\mu}_1\| - \frac{\epsilon}{2}} \frac{n}{\pi\sigma_1^2} e^{-\frac{n}{\sigma_1^2}\|\mathbf{z} - \boldsymbol{\mu}_1\|^2} d\mathbf{z} \\ &\leq \int_{\|\mathbf{z}\| \leq \|\boldsymbol{\mu}_1\| - \frac{\epsilon}{2}} \frac{n}{\pi\sigma_1^2} e^{-\frac{n}{\sigma_1^2}(\|\boldsymbol{\mu}_1\| - \|\mathbf{z}\|)^2} d\mathbf{z} \\ &\leq \int_{\|\mathbf{z}\| \leq \|\boldsymbol{\mu}_1\| - \frac{\epsilon}{2}} \frac{n}{\pi\sigma_1^2} e^{-\frac{n}{4\sigma_1^2}\epsilon^2} d\mathbf{z} \\ &= \left(\|\boldsymbol{\mu}_1\| - \frac{\epsilon}{2}\right)^2 \frac{n}{\sigma_1^2} e^{-\frac{n\epsilon^2}{4\sigma_1^2}} \\ &\leq \|\boldsymbol{\mu}_1\|^2 \frac{n}{\sigma_1^2} e^{-\frac{n\epsilon^2}{4\sigma_1^2}}. \quad (37) \end{aligned}$$

For the second term, observe that, given  $\|\bar{\mathbf{x}}_{1,n}\| \leq \|\boldsymbol{\mu}_1\| - \epsilon$  and  $S_{1,n} = s$ :

$$\begin{aligned} \mathbb{P}\left\{\|\tilde{\boldsymbol{\mu}}_1(t)\| \geq \|\boldsymbol{\mu}_1\| - \epsilon \mid \hat{\theta}_{1,n}\right\} &\geq \int_{-\alpha}^{\alpha} \int_{\frac{\|\boldsymbol{\mu}_1\| - \|\bar{\mathbf{x}}_{1,n}\| - \epsilon}{\cos\alpha}}^{\infty} \frac{n(n-2)}{\pi s} \left(1 + \frac{nr^2}{s}\right)^{-n+1} r dr d\phi \\ &= \frac{\alpha}{\pi} \left(1 + \frac{n(\|\boldsymbol{\mu}_1\| - \|\bar{\mathbf{x}}_{1,n}\| - \epsilon)^2}{s \cos^2 \alpha}\right)^{-n+2}, \quad (38) \end{aligned}$$

for every  $\alpha \in (0, \pi/2)$ . It then follows that

$$\mathbb{E}\left\{\frac{\mathbb{1}\left\{\|\bar{\mathbf{x}}_{1,n}\| \leq \|\boldsymbol{\mu}_1\| - \epsilon\right\}}{\mathbb{P}\left\{\|\tilde{\boldsymbol{\mu}}_1(t)\| \geq \|\boldsymbol{\mu}_1\| - \epsilon \mid \hat{\theta}_{1,n}\right\}}\right\}$$

$$\begin{aligned}
 &= \int_0^\infty \int_{\|\mathbf{x}\| \leq \|\boldsymbol{\mu}_1\| - \epsilon} \frac{ns^{n-2}}{\pi \Gamma(n-1)} \frac{e^{-\frac{1}{\sigma_1^2}(s+n\|\mathbf{x}-\boldsymbol{\mu}\|^2)}}{\sigma_k^{2n}} \frac{\pi}{\alpha} \left(1 + \frac{n(\|\boldsymbol{\mu}_1\| - \|\mathbf{x}\| - \epsilon)^2}{s \cos^2 \alpha}\right)^{n-2} d\mathbf{x} ds \\
 &\stackrel{(a)}{\leq} \frac{ne^{-n\epsilon^2/\sigma_1^2}}{\alpha \Gamma(n-1) \sigma_1^{2n}} \int_0^\infty s^{n-2} e^{-s/\sigma_1^2} \int_{\|\mathbf{x}\| \leq \|\boldsymbol{\mu}_1\| - \epsilon} e^{-\frac{n(\|\boldsymbol{\mu}_1\| - \|\mathbf{x}\| - \epsilon)^2}{\sigma_1^2}} \left(1 + \frac{n(\|\boldsymbol{\mu}_1\| - \|\mathbf{x}\| - \epsilon)^2}{s \cos^2 \alpha}\right)^{n-2} d\mathbf{x} ds \\
 &\stackrel{(b)}{=} \frac{2\pi ne^{-n\epsilon^2/\sigma_1^2}}{\alpha \Gamma(n-1) \sigma_1^{2n}} \int_0^\infty s^{n-2} e^{-s/\sigma_1^2} \int_0^{\|\boldsymbol{\mu}_1\| - \epsilon} e^{-\frac{n(\|\boldsymbol{\mu}_1\| - v - \epsilon)^2}{\sigma_1^2}} \left(1 + \frac{n(\|\boldsymbol{\mu}_1\| - v - \epsilon)^2}{s \cos^2 \alpha}\right)^{n-2} v dv ds \\
 &\stackrel{(c)}{=} \frac{2\pi ne^{-n\epsilon^2/\sigma_1^2}}{\alpha 2^{n-1} \Gamma(n-1) \sigma_1^{2n}} \int_0^\infty s^{n-2} e^{-s/\sigma_1^2} \int_\epsilon^{\|\boldsymbol{\mu}_1\|} e^{-\frac{n(r-\epsilon)^2}{\sigma_1^2}} \left(1 + \frac{n(r-\epsilon)^2}{s \cos^2 \alpha}\right)^{n-2} (\|\boldsymbol{\mu}_1\| - r) dr ds \\
 &\leq \frac{2\pi \|\boldsymbol{\mu}_1\| ne^{-n\epsilon^2/\sigma_1^2}}{\alpha \Gamma(n-1) \sigma_1^{2n}} \int_0^\infty s^{n-2} e^{-s/\sigma_1^2} \int_\epsilon^\infty e^{-\frac{n(r-\epsilon)^2}{\sigma_1^2}} \left(1 + \frac{n(r-\epsilon)^2}{s \cos^2 \alpha}\right)^{n-2} dr ds, \tag{39}
 \end{aligned}$$

where inequality (a) follows from  $\|\boldsymbol{\mu}_1 - \mathbf{x}\|^2 \geq (\|\boldsymbol{\mu}_1 - \mathbf{x}\| - \epsilon)^2 + \epsilon^2 \geq (\|\boldsymbol{\mu}_1\| - \|\mathbf{x}\| - \epsilon)^2$  whenever  $\|\mathbf{x}\| \leq \|\boldsymbol{\mu}_1\| - \epsilon$ . Equality in (b) follows from a change of variables  $\mathbf{x}$  to polar coordinates  $(v, \theta)$ , while (c) is consequence of changing  $v$  via  $r = \|\boldsymbol{\mu}_1\| - v$ . We now introduce a new change of variables in (39):

$$\begin{cases} r = \epsilon - \cos \alpha \sqrt{\frac{zw}{n}} \\ s = z(1-w) \end{cases} \implies dr ds = \left| \det \begin{bmatrix} \frac{\cos \alpha}{2} \sqrt{\frac{w}{nz}} & (1-w) \\ \frac{\cos \alpha}{2} \sqrt{\frac{z}{nw}} & -z \end{bmatrix} \right| dw dz = \frac{\cos \alpha}{2} \sqrt{\frac{z}{nw}} dw dz,$$

allowing us to rewrite the double integral in (39) as

$$\begin{aligned}
 &\int_0^\infty z^{n-2} \sqrt{z} e^{-\frac{z}{\sigma_1^2}} \int_0^1 e^{-z/\sigma_1^2} w^{-\frac{1}{2}} \frac{\cos \alpha}{2\sqrt{n}} dw dz \\
 &= \frac{\cos \alpha}{2\sqrt{n}} \int_0^\infty z^{n-2} \sqrt{z} e^{-z/\sigma_1^2} \frac{\sigma_1}{\sqrt{z} \sin \alpha} e^{\frac{z \sin^2 \alpha}{\sigma_1^2}} D\left(\sqrt{z} \frac{\sin \alpha}{\sigma_1}\right) dz \\
 &\stackrel{(d)}{\leq} \frac{\sigma_1}{2\sqrt{n} \tan \alpha} \int_0^\infty z^{n-2} e^{-z \cos^2 \alpha / \sigma_1^2} dz \\
 &= \frac{\sigma_1}{2\sqrt{n} \tan(\alpha)} \frac{\sigma_1^{2(n-1)}}{\cos^{2(n-1)}(\alpha)} \Gamma(n-1), \tag{40}
 \end{aligned}$$

where (d) follows from Dawson's function  $D$  [27] being upper bounded by 1. Finally, using this upper bound in (39) yields

$$\mathbb{E} \left\{ \frac{\mathbb{1} \{ \|\bar{\mathbf{x}}_{1,n}\| \leq \|\boldsymbol{\mu}_1\| - \epsilon \}}{\mathbb{P} \{ \|\tilde{\boldsymbol{\mu}}_1(t)\| \geq \|\boldsymbol{\mu}_1\| - \epsilon \mid \hat{\theta}_{1,n} \}} \right\} \leq \frac{\pi \|\boldsymbol{\mu}_1\| \cos^3 \alpha}{\sigma_1 \sin \alpha} \sqrt{n} \left( \frac{e^{-\epsilon^2/\sigma_1^2}}{\cos^2 \alpha} \right)^n, \tag{41}$$

for every  $\alpha \in (0, 2\pi)$ . In particular, when  $\alpha$  is small, the sequence in  $n$  defined by the right-hand side of (41) converges to zero for  $\alpha$  satisfying  $\cos^2 \alpha \approx 1 - \alpha^2/2 = e^{-\epsilon^2/(2\sigma_1^2)}$ , i.e., for  $\alpha = \sqrt{2(1 - e^{\epsilon^2/(2\sigma_1^2)})} = O(\epsilon)$ . With this particular choice, and for small  $\epsilon$ , the bound in (41) becomes

$$\mathbb{E} \left\{ \frac{\mathbb{1} \{ \|\bar{\mathbf{x}}_{1,n}\| \leq \|\boldsymbol{\mu}_1\| - \epsilon \}}{\mathbb{P} \{ \|\tilde{\boldsymbol{\mu}}_1(t)\| \geq \|\boldsymbol{\mu}_1\| - \epsilon \mid \hat{\theta}_{1,n} \}} \right\} \leq \frac{\pi \|\boldsymbol{\mu}_1\|}{\alpha^2 \sigma_1} \sqrt{n} \left( e^{-\epsilon^2/(2\sigma_1^2)} \right)^n. \tag{42}$$

From Lemma 3, the third term in (36) is upper bounded as

$$\mathbb{E} \left\{ \mathbb{1} \left\{ \|\bar{\mathbf{x}}_{1,n}\| \geq \|\boldsymbol{\mu}_1\| - \frac{\epsilon}{2}, S_{1,n} \geq n2\sigma_1^2 \right\} \right\} \leq \mathbb{P} \{ S_{1,n} \geq n2\sigma_1^2 \} \leq 2 \left( 1 + \frac{\epsilon}{\sigma_k^2} \right)^{-1} e^{-nh(1)}. \tag{43}$$

To upper bound the fourth term in (36), denote  $\mathcal{C}_{1,n} := \{\|\bar{\mathbf{x}}_{1,n}\| \geq \|\boldsymbol{\mu}_1\| - \frac{\epsilon}{2}, S_{1,n} \leq 2\sigma_1^2 n\}$ . Then by introducing a polar-coordinates change of variable:

$$\begin{aligned} 1 - \mathbb{P}\{\|\tilde{\boldsymbol{\mu}}_1(t)\| \geq \|\boldsymbol{\mu}_1\| - \epsilon \mid \mathcal{C}_{1,n}\} &= \mathbb{P}\{\|\tilde{\boldsymbol{\mu}}_1(t)\| \leq \|\boldsymbol{\mu}_1\| - \epsilon \mid \mathcal{C}_{1,n}\} \\ &\leq \int_{-\pi}^{\pi} \int_{\frac{\epsilon}{2}}^{\infty} \frac{n(n-2)}{\pi s} \left(1 + \frac{nr^2}{s}\right)^{-n+1} r dr d\phi, \quad (\cdot, s) \in \mathcal{C}_{1,n}, \\ &\leq \left(1 + \frac{\epsilon^2}{8\sigma_1^2}\right)^{-n+2}, \end{aligned} \quad (44)$$

and therefore

$$\begin{aligned} \mathbb{E}\left\{\mathbb{1}\left\{\|\bar{\mathbf{x}}_{1,n}\| \geq \|\boldsymbol{\mu}_1\| - \frac{\epsilon}{2}, S_{k,n} \leq n2\sigma_1^2\right\} \left(1 - \mathbb{P}\left\{\|\tilde{\boldsymbol{\mu}}_1(t)\| \geq \|\boldsymbol{\mu}_1\| - \epsilon \mid \hat{\theta}_{1,n}\right\}\right)\right\} \\ \leq \left(1 + \frac{\epsilon^2}{8\sigma_1^2}\right)^{-n+2}. \end{aligned} \quad (45)$$

Putting together (37),(42),(43) and (45) together with (34) lead us to

$$\begin{aligned} &\sum_{n=\bar{T}+1}^T \mathbb{E}\left\{\frac{1 - \mathbb{P}\left\{\|\tilde{\boldsymbol{\mu}}_1(t)\| \geq \|\boldsymbol{\mu}_1\| - \epsilon \mid \hat{\theta}_{1,n}\right\}}{\mathbb{P}\left\{\|\tilde{\boldsymbol{\mu}}_1(t)\| \geq \|\boldsymbol{\mu}_1\| - \epsilon \mid \hat{\theta}_{1,n}\right\}}\right\} \\ &\leq \sum_{n=\bar{T}+1}^T \|\boldsymbol{\mu}_1\|^2 \frac{n}{\sigma_1^2} e^{\frac{-n\epsilon^2}{4\sigma_1^2}} + \frac{\pi\|\boldsymbol{\mu}_1\|}{\alpha^2\sigma_1} \sqrt{n} \left(e^{-\epsilon^2/(2\sigma_1^2)}\right)^n + 2\left(1 + \frac{\epsilon}{\sigma_k^2}\right)^{-1} e^{-nh(1)} + \left(1 + \frac{\epsilon^2}{8\sigma_1^2}\right)^{-n+2} \\ &\leq \frac{\|\boldsymbol{\mu}_1\|^2}{\sigma_1^2} \frac{e^{-\epsilon^2/(4\sigma_1^2)}}{1 - e^{-\epsilon^2/(4\sigma_1^2)}} + \frac{\pi\|\boldsymbol{\mu}_1\|}{\alpha^2\sigma_1} \frac{e^{-\epsilon^2/(2\sigma_1^2)}}{(1 - e^{-\epsilon^2/(2\sigma_1^2)})^2} + \frac{2\left(1 + \frac{\epsilon}{\sigma_k^2}\right)^{-1}}{1 - e^{-h(1)}} + \frac{8\sigma_1^2}{\epsilon^2} \\ &= O(\epsilon^{-2}) + O(\epsilon^{-6}) + O(1) + O(\epsilon^{-2}) = O(\epsilon^{-6}). \end{aligned} \quad (46)$$

■
